# Supplementary material for: Ammonia Detection Methods in Photocatalytic and Electrocatalytic Experiments: How to Improve the Reliability of NH3 Production Rates?
Source: PubMed Central journal article supplement (PMC6468971; doi:10.1002/advs.201802109), 2019-02-15
Supplement: ADVS-6-1802109-s001.pdf [file ADVS-6-1802109-s001.pdf]

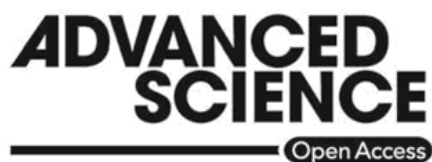

## Supporting Information

for *Adv. Sci.*, DOI: 10.1002/adv.201802109

Ammonia Detection Methods in Photocatalytic and  
Electrocatalytic Experiments: How to Improve the Reliability  
of NH<sub>3</sub> Production Rates?

*Yunxuan Zhao, Run Shi, Xuanang Bian, Chao Zhou, Yufei  
Zhao, Shuai Zhang, Fan Wu, Geoffrey I. N. Waterhouse, Li-  
Zhu Wu, Chen-Ho Tung, and Tierui Zhang\**

Copyright WILEY-VCH Verlag GmbH & Co. KGaA, 69469 Weinheim, Germany,

2019.

## Supporting Information

### **Ammonia Detection Methods in Photocatalytic and Electrocatalytic Experiments: How to Improve the Reliability of NH<sub>3</sub> Production Rates?**

*Yunxuan Zhao, Run Shi, Xuanang Bian, Chao Zhou, Yufei Zhao, Shuai Zhang, Fan Wu, Geoffrey I.N. Waterhouse, Li-Zhu Wu, Chen-Ho Tung and Tierui Zhang\**

**Materials:**

AgNO<sub>3</sub>, LiCl, RuCl<sub>3</sub>·3H<sub>2</sub>O, Ce(NO<sub>3</sub>)<sub>3</sub>·6H<sub>2</sub>O, In(NO<sub>3</sub>)<sub>3</sub>·6H<sub>2</sub>O, Fe(NO<sub>3</sub>)<sub>3</sub>·9H<sub>2</sub>O, FeCl<sub>2</sub>·4H<sub>2</sub>O, Co(NO<sub>3</sub>)<sub>2</sub>·6H<sub>2</sub>O, Zn(NO<sub>3</sub>)<sub>2</sub>·6H<sub>2</sub>O, Cr(NO<sub>3</sub>)<sub>3</sub>·9H<sub>2</sub>O, Cu(NO<sub>3</sub>)<sub>2</sub>·3H<sub>2</sub>O, Ni(NO<sub>3</sub>)<sub>2</sub>·6H<sub>2</sub>O, methanol, ethanol, acetone, isopropanol, formamide, dimethyl formamide (DMF), dimethylsulfoxide (DMSO), triethanolamine, hexadecyltrimethylammonium bromide (CTAB), urea, oleic acid, oleylamine, thioacetamide (TAA), hexamethylenetetramine (HMT), NaOH and HCl (37 wt.%) were obtained from Aladdin and Beijing Chemical Works. (<sup>15</sup>NH<sub>4</sub>)<sub>2</sub>SO<sub>4</sub> and <sup>14</sup>NH<sub>4</sub>Cl were obtained from Aladdin. All reagents were analytical grade and used without further purification. Argon gas (99.999 %) was obtained from Beijing Qianxi Gases Company (Beijing, China). Ultrapure distilled water was used in all experiments. Ketjenblack ® EC-300J was obtained from Shanghai Buding Chemical Co., Ltd. A tap water sample was obtained from a domestic residence in Beijing.

**Synthesis of LDH materials:**

The LDHs nanosheets were prepared using a co-precipitation method.<sup>[1]</sup> The method used a modified colloid mill to achieve rapid mixing and nucleation processes, followed by a separate hydrothermal aging step at 120 °C for 12 h.

**Synthesis of C-based materials:**

C-based materials were synthesized using a microwave method.<sup>[2]</sup> Typically, 100 mg of tungstic acid, 2 g of glucose and 10 mL of PEG-200 were dissolved into 3 mL of distilled water to form a mixed solution. The mixed solution was then heated in 300 W microwave for 2.5 min. The precipitates formed were filtered, washed with water and ethanol, and finally dried at 60 °C for 24 h.

**Synthesis of N-doped TiO<sub>2</sub>:**

Commercial TiO<sub>2</sub> (P25) (300 mg) was placed in an alumina tube furnace and then heated to 500 °C in an atmosphere of flowing NH<sub>3</sub> (30 mL min<sup>-1</sup>) at a heating rate of 5 °C min<sup>-1</sup>. After ammonolysis at 500 °C for 3 h, the sample was cooled to room temperature, and the product was collected.

#### **Synthesis of N-doped Carbon:**

Zn, Co-ZIF<sup>[3]</sup> (400 mg) was placed in an alumina tube furnace and then heated to 900 °C in an atmosphere of flowing NH<sub>3</sub> (30 mL min<sup>-1</sup>) at a heating rate of 5 °C min<sup>-1</sup>. After ammonolysis at 900 °C for 2 h, the sample was cooled to room temperature and the product was collected.

#### **Synthesis of Ni<sub>3</sub>N and Ni<sub>3</sub>FeN:**

Commercial NiO (300 mg) or NiFe-LDH (300 mg) was placed in an alumina tube furnace and then heated to 500 °C in an atmosphere of flowing NH<sub>3</sub> (30 mL min<sup>-1</sup>) at a heating rate of 5 °C min<sup>-1</sup>. After ammonolysis at 500 °C for 4 h, samples were cooled to room temperature and the product was collected.

#### **Synthesis of g-C<sub>3</sub>N<sub>4</sub>:**

g-C<sub>3</sub>N<sub>4</sub> was obtained using a standard thermal polymerization method.<sup>[4]</sup>

#### **Preparation of ammonia solutions with different pH:**

Ammonia solutions with different pH were prepared by adding an appropriate amount of 28 wt.% NH<sub>3</sub> to a specific volume of water, followed by pH adjustment with either aqueous H<sub>2</sub>SO<sub>4</sub> (0.05 mol L<sup>-1</sup>) or aqueous NaOH (1 mol L<sup>-1</sup>). The final concentration of ammonia in all solutions was 1000 µg L<sup>-1</sup>.

#### **NH<sub>3</sub> production and control experiments:**

A series of experiments were performed under UV-visible light irradiation (200-800 nm) supplied by a 300 W Xe lamp (CEL-HXF 300). Typically, photocatalyst or potential interferant (1 mmol) were dispersed in 100 mL of ultrapure water in a 150 mL quartz reactor. The reactor was equipped with a circulating water outer jacket in order to maintain at a constant temperature of 25 °C. The photocatalyst suspension or solutions containing the

possible interferants were stirred continuously in the dark whilst either high-purity N<sub>2</sub> or high purity Ar was bubbled through the suspension at a flow rate of 60 mL min<sup>-1</sup> for 10 min. The reactor was then irradiated using the 300 W Xe lamp under either a N<sub>2</sub> or Ar flow (100 mL min<sup>-1</sup>). At regular intervals, 3 mL aliquots of the reaction solution were collected using a syringe, then immediately centrifuged to remove any solid material. The concentrations of NH<sub>3</sub> was determined by ion chromatography (930 compact IC Flex, Metrohm). Errors in the data were expressed as follows:

**The relative error:**  $Er = \frac{X-M}{M} \times 100\%$ , where X is the measured value and M is the true value.

**The absolute error:**  $Ea = X - M$ , where X is the measured value and M is the true value.

**The faradaic efficiency** was calculated according to the following equation:<sup>[5]</sup>

$$\text{The faradaic efficiency} = 3 \times F \times [\text{NH}_3] \times V / (17 \times Q) \times 100\%$$

where [NH<sub>3</sub>] is the measured NH<sub>3</sub> concentration; V is the volume of the cathodic reaction solution for NH<sub>3</sub> collection; t is the potential applied time; A is the geometric area; m is the loaded mass of catalyst; F is the Faraday constant; and Q is the quantity of applied electricity.

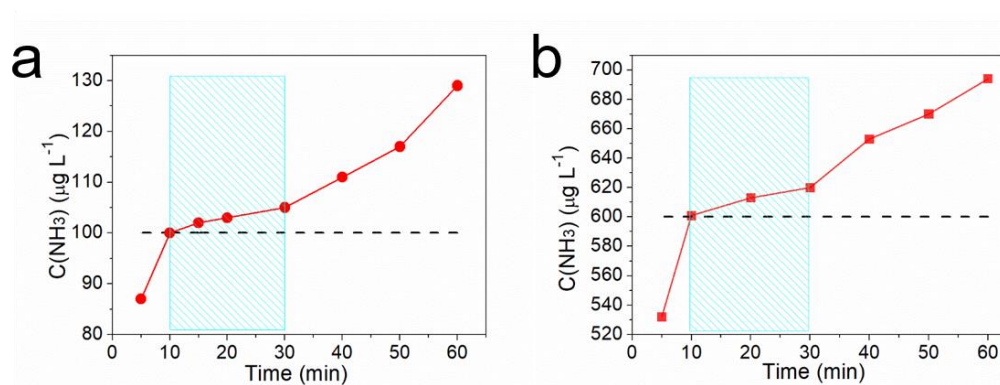

**Figure S1.** Time course of detected  $\text{NH}_3$  by Nessler's reagents method for a certain concentration of aqueous ammonium solution (a): 100  $\mu\text{g L}^{-1}$  and (b): 600  $\mu\text{g L}^{-1}$ .

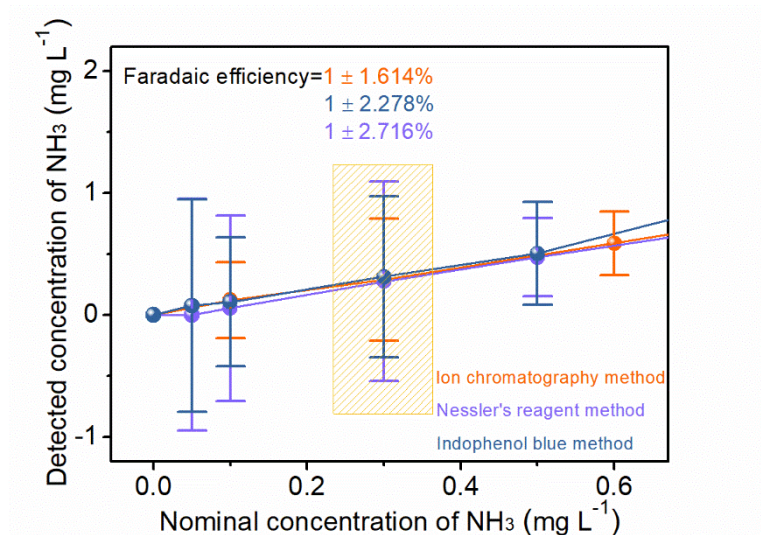

**Figure S2.** The Faradaic efficiency based on different methods of ammonia quantification.

For a Faradaic efficiency of 1%, the  $\text{NH}_3$  yield is estimated to be about  $300 \mu\text{g L}^{-1}$ . Figure S2 shows that the different methods of ammonia quantification afford different Faradaic efficiencies: 1.614% for ion chromatography method, 2.278% for the indophenol blue method and 2.716% for Nessler's reagent method. Thus, longer reaction time are recommended, thereby allowing more accurate ammonia quantification.

**Table S1** The effect of different metal ions on ammonia detection by the UV method without Nessler's reagent under acidic conditions.

| Sample                                         | Absorbance | Concentration <sup><math>\alpha</math></sup><br>( $\mu\text{g L}^{-1}$ ) |
|------------------------------------------------|------------|--------------------------------------------------------------------------|
| No metal ions <sup><math>\beta</math></sup>    | 0-0.001    | 0                                                                        |
| Ag <sup>+</sup> <sup><math>\gamma</math></sup> | 0.001      | 0                                                                        |
| Ru <sup>3+</sup>                               | 0.020      | 126                                                                      |
| Ce <sup>3+</sup>                               | 0.001      | 0                                                                        |
| In <sup>3+</sup>                               | 0.005      | 27                                                                       |
| Fe <sup>2+</sup>                               | 0.001      | 0                                                                        |
| Zn <sup>2+</sup>                               | 0.001      | 0                                                                        |
| Cr <sup>3+</sup>                               | 0.001      | 0                                                                        |
| Cu <sup>2+</sup>                               | 0.001      | 0                                                                        |
| Ni <sup>2+</sup>                               | 0.001      | 0                                                                        |
| Fe <sup>3+</sup>                               | 0.003      | 13                                                                       |
| Co <sup>2+</sup>                               | 0.001      | 0                                                                        |

$\alpha$ :  $Y=0.0001504X+0.01293$ , where Y is the apparent  $\text{NH}_3$  concentration in  $\text{mg L}^{-1}$  and X is the absorbance value.

$\beta$ : Acid solution (pH 1) without any metal ions and Nessler's reagent.

$\gamma$ : Acidic solution (pH 1) containing different metal ions ( $0.01 \text{ mmol L}^{-1}$ ) without adding Nessler's reagent and ammonia.



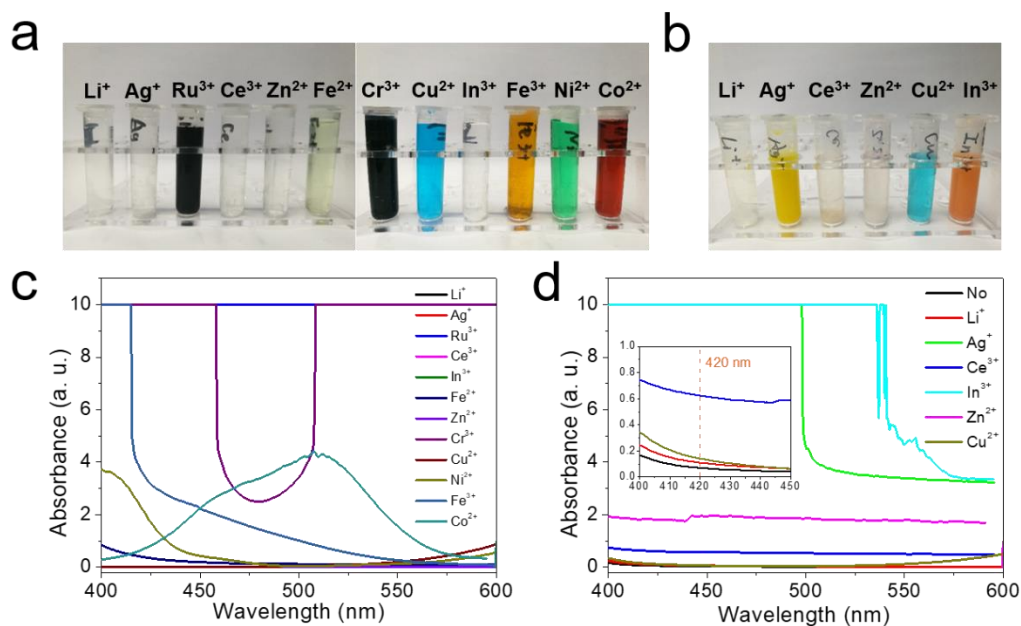

**Figure S3.** Photographs of ammonia solutions containing high metal ion concentrations (0.5 M) before (a) and after (b) adding Nessler's reagent. Corresponding UV-vis absorption spectra before (c) and after (d) adding Nessler's reagent.

The UV-vis absorption spectra of aqueous solution containing certain metal ions (i.e. 0.5 M solutions of Ru<sup>3+</sup>, Fe<sup>2/3+</sup>, Cr<sup>3+</sup>, Ni<sup>2+</sup> and Co<sup>2+</sup>) without Nessler's reagent show obvious absorption at 420 nm. Hence, these metal ions at high concentration could interfere with the accurate quantification of NH<sub>3</sub>. Further, adding Nessler's reagent to solutions containing other metal ions in high concentration (i.e. 0.5 M solutions of Li<sup>+</sup>, Ag<sup>+</sup>, Ce<sup>3+</sup>, In<sup>3+</sup>, Zn<sup>2+</sup> and Cu<sup>2+</sup>) caused some absorption at 420 nm, especially solutions contained Ag<sup>+</sup>, Ce<sup>3+</sup>, In<sup>3+</sup> or Zn<sup>2+</sup> for which a precipitate formed, leading to cloudiness and therefore interference detection. Although solutions of Li<sup>+</sup> and Cu<sup>2+</sup> ions did not form a precipitate, these metal ions still interfere with ammonia detection.

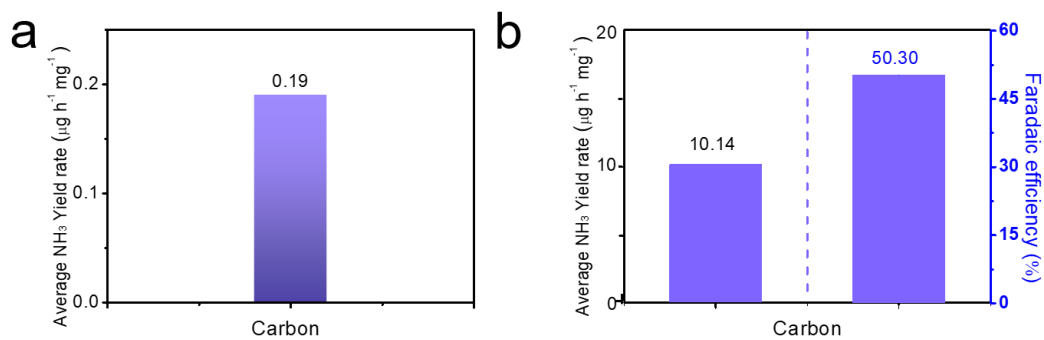

**Figure S4.** (a) Ammonia evolution rate for carbon materials (Ketjenblack®EC-300J) soaked in 0.05 M H<sub>2</sub>SO<sub>4</sub> for 40 min under ambient conditions. (b) Ammonia evolution rate and Faradaic efficiency for carbon materials at -0.2 V versus RHE in Ar atmosphere for 40 min.

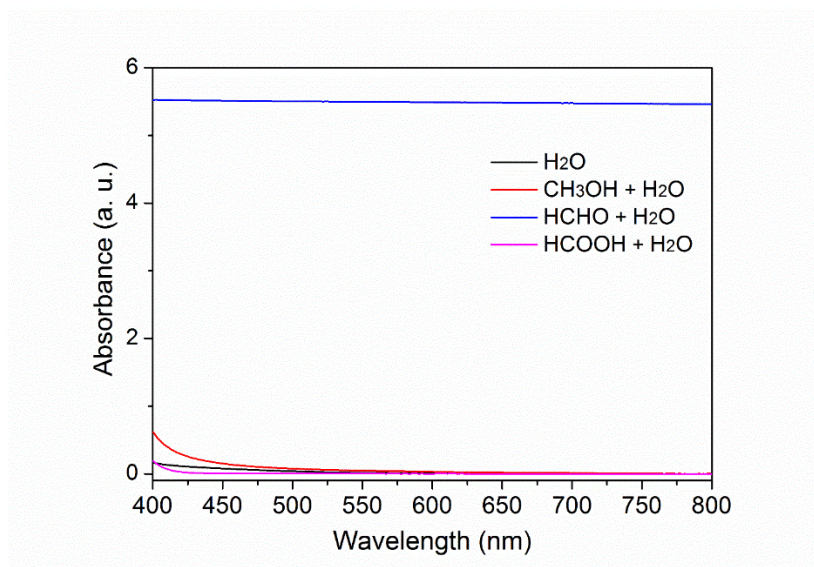

**Figure S5.** UV-vis absorbance spectra for ammonia solutions at the same concentration ( $600 \mu\text{g L}^{-1}$ ) in the presence of different organic solvents detected by Nessler's reagent method.

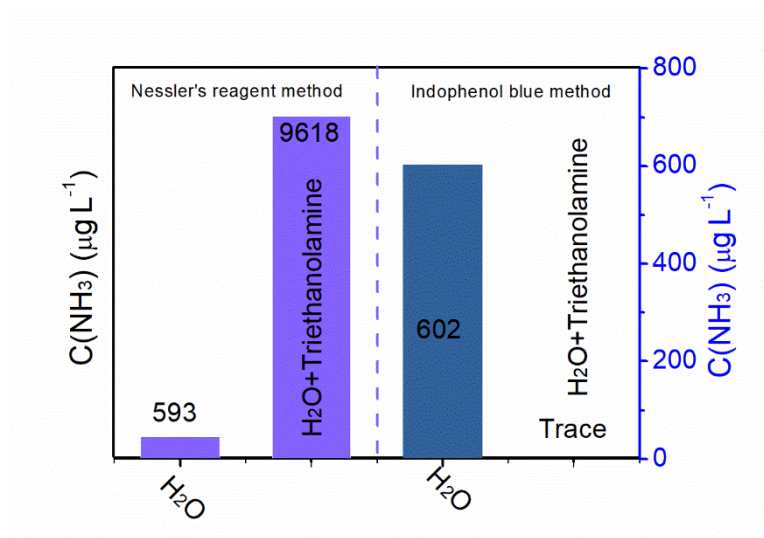

**Figure S6.** The apparent concentration of ammonia detected in the presence of triethanolamine. The ammonia concentration was  $600 \mu\text{g L}^{-1}$  in all experiments. The sacrificial agent concentration was 40 vol.%.

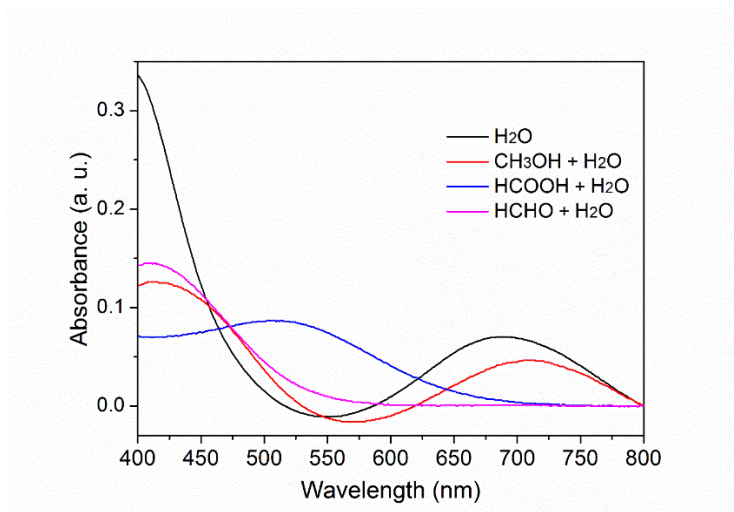

**Figure S7.** UV-vis absorbance spectra for ammonia solutions of the same concentration ( $600 \mu\text{g L}^{-1}$ ) containing different organic solvents detected by the indophenol blue method.

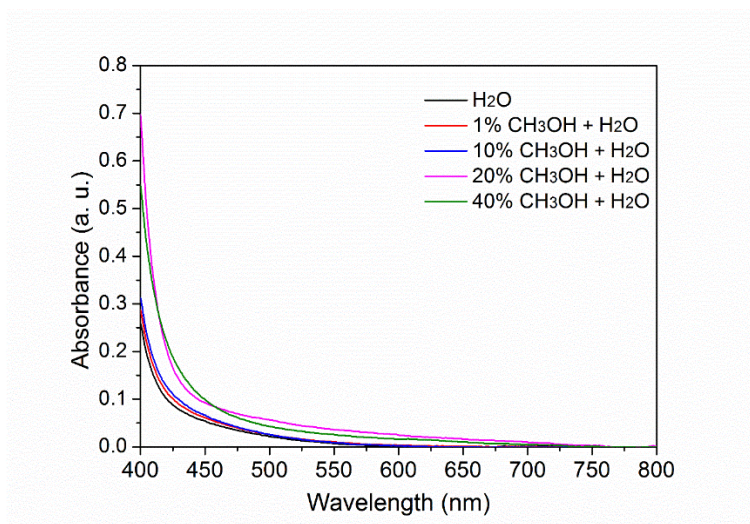

**Figure S8.** UV-vis absorption spectra for ammonia solutions of the same concentration ( $600 \mu\text{g L}^{-1}$ ) containing different concentrations of methanol detected by the Nessler's reagent method.

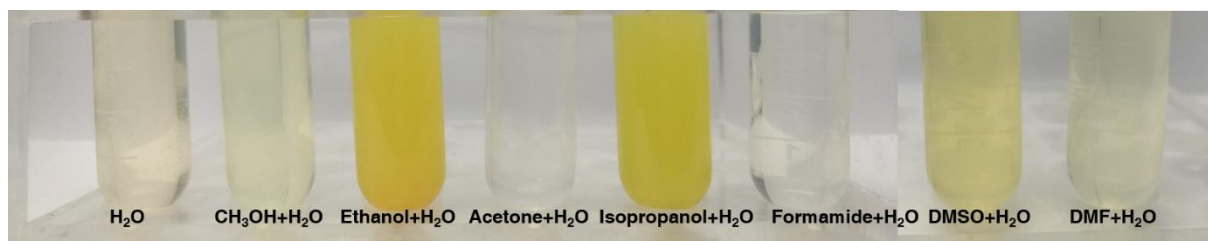

**Figure S9.** Photograph of various solutions using the Nessler's reagent method.

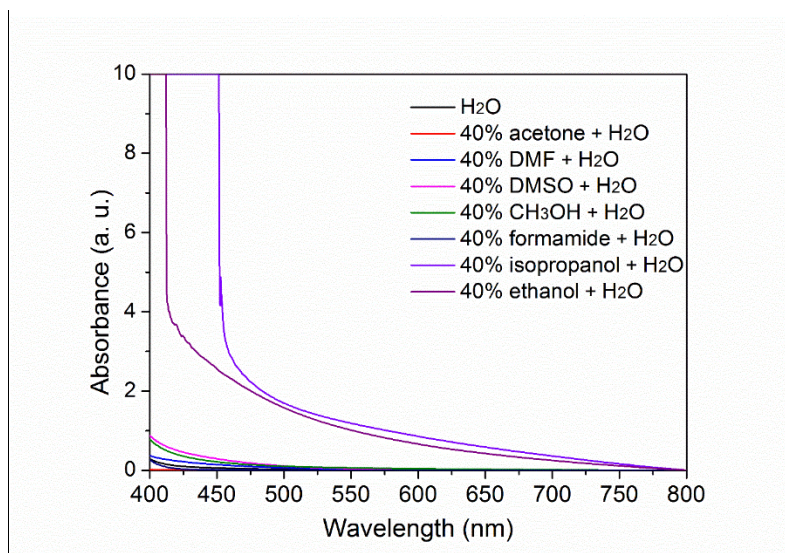

**Figure S10.** UV-vis absorbance spectra for ammonia solutions of the same concentration ( $600 \mu\text{g L}^{-1}$ ) containing different organic solvents detected using the Nessler's reagent method.



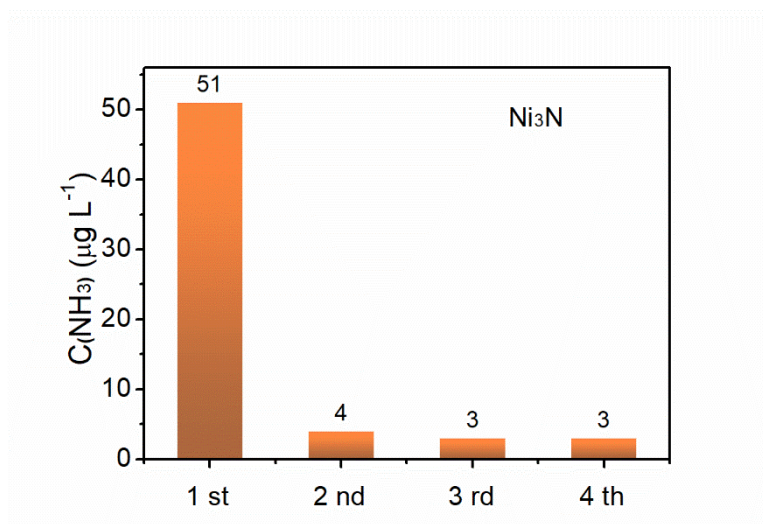

**Figure S11.** Ammonia concentration of aqueous solutions containing  $\text{Ni}_3\text{N}$  before and after washing with ultrapure water.

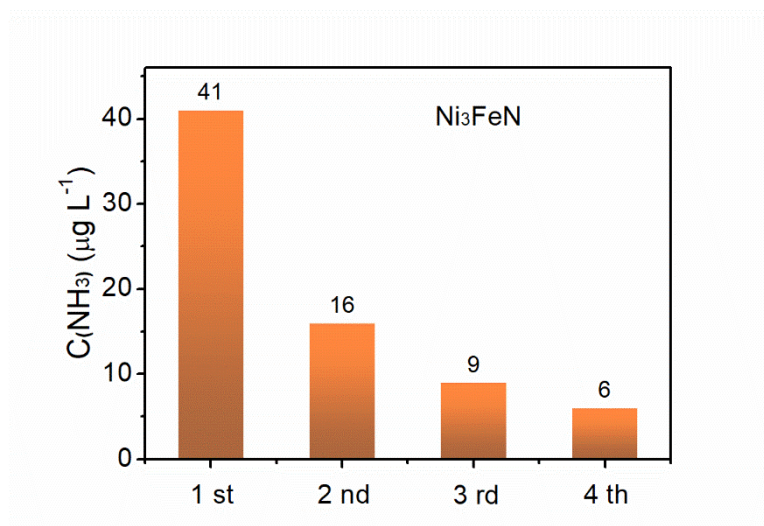

**Figure S12.** Ammonia concentration of aqueous solutions containing Ni<sub>3</sub>FeN before and after washing with ultrapure water.

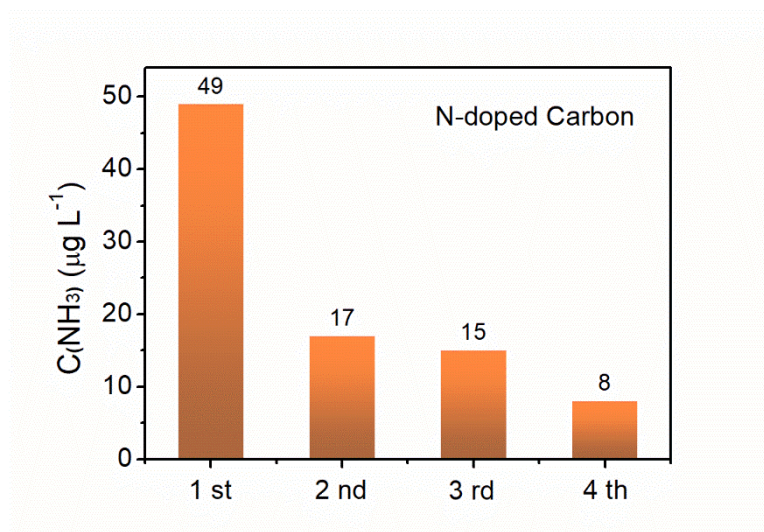

**Figure S13.** Ammonia concentration of aqueous solutions containing N-doped Carbon before and after washing with ultrapure water.

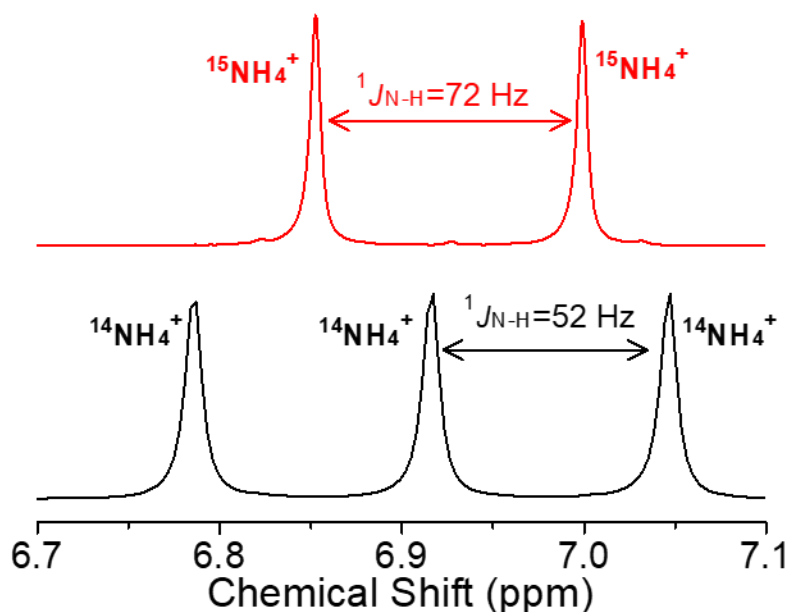

**Figure S14.** <sup>1</sup>H NMR analysis of 20% DMSO-d<sub>6</sub> solutions containing (<sup>15</sup>NH<sub>4</sub>)<sub>2</sub>SO<sub>4</sub> and <sup>14</sup>NH<sub>4</sub>Cl (1 mg L<sup>-1</sup>).

The origin of nitrogen in photocatalytic and electrocatalytic experiments can be convincingly established using isotopically labelled <sup>15</sup>N<sub>2</sub>, with the <sup>15</sup>NH<sub>4</sub><sup>+</sup> product detected with high sensitivity by <sup>1</sup>H NMR or mass-spectroscopy. Due to the presence of water, FT-IR detection of <sup>15</sup>NH<sub>4</sub><sup>+</sup> is challenging. **It is worth noting that there is low level contamination from isotope labeled gases due to the special synthetic process of <sup>15</sup>N<sub>2</sub>, which should be of particular concern.**

Due to the typically low concentrations of <sup>15</sup>NH<sub>4</sub><sup>+</sup> in the reaction solution and the high cost of <sup>15</sup>N<sub>2</sub>, the sensitivity of the testing equipment to <sup>15</sup>NH<sub>4</sub><sup>+</sup> should first be ascertained. It is recommended that (<sup>15</sup>NH<sub>4</sub>)<sub>2</sub>SO<sub>4</sub> and <sup>14</sup>NH<sub>4</sub>Cl are obtained from a commercial supplier, such as Aladdin, as reference materials. Aqueous solutions of ammonia containing specific concentrations of <sup>15</sup>NH<sub>4</sub><sup>+</sup> and <sup>14</sup>NH<sub>4</sub><sup>+</sup> can then be prepared and used to test the sensitivity of the instrument and develop NH<sub>4</sub><sup>+</sup> quantification protocols. Figure S14 shows <sup>1</sup>H NMR spectra for 1 mg L<sup>-1</sup> solutions of <sup>15</sup>NH<sub>4</sub><sup>+</sup> and <sup>14</sup>NH<sub>4</sub><sup>+</sup>. The data show that <sup>14</sup>NH<sub>4</sub><sup>+</sup> produces <sup>14</sup>N a triplet in the region near 6.8~7.05 ppm, whereas <sup>15</sup>NH<sub>4</sub><sup>+</sup> appears as a doublet in the same region.

For NH<sub>3</sub> production via electrocatalysis, the reactor, electrode and catalyst (if used for cycling tests) require repeated cleaning with ultra-pure water or acid to remove residual ammonia before commencing a test run. Then, <sup>14</sup>N<sub>2</sub> should be used to screen catalysts and optimize reaction conditions. If the amount of ammonia generated during the reaction is sufficient to exceed the detection limit of <sup>1</sup>H NMR, then that method should be used to confirm <sup>14</sup>NH<sub>4</sub><sup>+</sup> formation. Finally, <sup>14</sup>N<sub>2</sub> should be replaced with <sup>15</sup>N<sub>2</sub> and the electrocatalytic

reaction performed under the same reaction conditions, with the products again analyzed by  $^1\text{H}$  NMR to confirm that  $\text{N}_2$  was the origin of the  $\text{NH}_4^+$  formed.

## References

- [1] Y. Zhao, Y. Zhao, G. I. Waterhouse, L. Zheng, X. Cao, F. Teng, L. Z. Wu, C. H. Tung, D. O'Hare, T. Zhang, *Adv. Mater.* **2017**, *29*, 1703828.
- [2] X. Li, W. Wang, D. Jiang, S. Sun, L. Zhang, X. Sun, *Chem. Eur. J.* **2016**, *22*, 13819.
- [3] Q. Wang, L. Shang, R. Shi, X. Zhang, G. I. N. Waterhouse, L.-Z. Wu, C.-H. Tung, T. Zhang, *Nano Energy* **2017**, *40*, 382.
- [4] H. Yu, R. Shi, Y. Zhao, T. Bian, Y. Zhao, C. Zhou, I. N. Waterhouse Geoffrey, L.-Z. Wu, C.-H. Tung, T. Zhang, *Adv. Mater.* **2017**, *29*, 1605148.
- [5] M.-M. Shi, D. Bao, B.-R. Wulan, Y.-H. Li, Y.-F. Zhang, J.-M. Yan, Q. Jiang, *Adv. Mater.* **2017**, *29*, 1606550.
